# Supplementary material for: Outcome of Emergency Obstetric Care training on knowledge and risk assessment skills of healthcare providers in Ibadan, Southwest Nigeria
Source: Research Square preprint supplement (doi:10.21203/rs.3.rs-7074106/v1), 2025-07-28

**QUESTIONNAIRE**

Dear respondents,

Good day, my name is **Famutimi Esther.**  I am a PhD student from the Department of Nursing, Faculty of Clinical Sciences, University of Ibadan. This questionnaire, titled ‘**Outcomes of Emergency Obstetric Care training on risk assessment and referral skills of Health Care Providers in Ibadan Metropolis**’, seeks to assess the knowledge and skills of EmOC among healthcare providers. Participation is voluntary, and you are free to ask any questions as you progress with the study or even discontinue. I assure you of utmost confidentiality and humbly request your sincere and detailed response, as these will be used for academic purposes only.

Thank you for your kind cooperation. If you agree to be part of this study, please tick this box with (√) as evidence of consent **[ ]**

**SECTION A: SOCIO-DEMOGRAPHIC DATA**

1. **Age:** (as at last birthday) _______________________
2. **Sex:** (a) male [ ] (b) female [ ]
3. **Religion**: (a) Christianity [ ] (b) Islam [ ] (c) traditional [ ] (d) [ ] others(specify)_____
4. **Tribe:** (a) Yoruba [ ] (b) Igbo [ ] (c) Hausa [ ] (d) others (specify)____________
5. **Marital status:** (a) Single [ ] (b) Married [ ] (c) Divorced [ ] (d) Separated [ ]
6. **Highest level of education**: (a) OND/CH [ ] (b) HND/CH[ ] (c) RN/RM[ ] (d)B.Sc (e)others (specify)_________________________
7. **Type of health professional** (a) Nurse [ ] (b) Midwife [ ] (c) CHO [ ] (d) CHEW [ ] (e)others (specify)………….
8. **Rank ____________________________________**
9. **Number of years since qualification ____________________________________**
10. **Number of years spent in present facility ____________________________________**

**SECTION B: KNOWLEDGE OF RESPONDENTS ON EmOC**

1. Have you ever heard of Emergency Obstetric Care (EmOC) a.) Yes (b) No

**ii.** If yes, what is/are your source(s) of information? [Multiple options allowed]

(a.) school during professional training (b.) colleagues/friends (c.) media (TV, radio, internet)

(d.) literature search (e.) workshop/conferences (f.) Others specify_______________

2. (i) Have you ever received any formal training on EmOC? (a.) Yes (b) No

(ii) If yes, how long ago? ---------------------------------years

3. (i). Is the WHO manual for managing obstetric complications available in your facility? (a.) Yes (b) No

(ii) If no, what alternative do you have? ---------------------------------

4 i. Is a partograph available to monitor the progress of labour at all in this facility? (a.) Yes (b) No

ii. If yes, can you use the partograph effectively? (a.) Yes (b) No

5. Do you perform any of these EmOC signal functions in your facility? Please indicate ⁎ for no answers and tick in the box provided for yes answers.

1. Parenteral oxytocics

yes please tick the and rate your knowledge in managing the following

1. Parenteral antibiotics

yes please tick the and rate your knowledge in managing the following

1. Manual removal of retained placenta

yes please tick the and rate your knowledge in managing the following

1. Parenteral anticonvulsants
2. Removal of retained products
3. Blood transfusion
4. Newborn resuscitation
5. Assisted vaginal delivery
6. Caesarean delivery

6. Indicate from the following list of common obstetric complications that clients usually experience at this facility. (Multiple Option Allowed)

- - 1. Antepartum Hemorrhage
    2. Post-Partum Hemorrhage
    3. Retained placenta
    4. Obstructed /prolonged labour
    5. Severe pre-eclampsia /eclampsia
    6. Sepsis
    7. Ruptured uterus
    8. Others, please specify? **____________________________________**

7. Please tick and rate your knowledge in managing the following by indicating as follows.

| **S/N** | **Variable** | **Weak** | | | **Needs improvement** | **Adequate** | **Excellent** | |
| --- | --- | --- | --- | --- | --- | --- | --- | --- |
|  | Haemorrhage |  | | |  |  |  | |
| ii. | Preeclampsia and Eclampsia |  | | |  |  |  | |
| iii. | Puerperal Infection |  | | |  |  |  | |
| iv. | Active management of the Third Stage of Labour |  | | |  |  |  | |
| v. | Partograph and routine labour |  | | |  |  |  | |
| vi. | Neonatal Resuscitation |  | | |  |  |  | |
|  | **Kindly rate your confidence in your skill in managing the following Emergencies.** | | | | | | | |
| 8i. | Haemorrhage | |  |  | |  | |  |
| ii. | Eclampsia | |  |  | |  | |  |
| iii. | Sepsis | |  |  | |  | |  |
| iv. | Shoulder Dystocia | |  |  | |  | |  |
| v. | Neonatal Resuscitation | |  |  | |  | |  |

**MANAGEMENT OF SHOCK: RAPID INITIAL ASSESSMENT**

| **S/N** | **VARIABLE** | **YES** | NO |
| --- | --- | --- | --- |
|  | **MANAGEMENT OF SHOCK: RAPID INITIAL ASSESSMENT** |  |  |
| 9 | Rapid initial assessment should be carried out on all women of childbearing age who present with a problem. |  |  |
| 10 | A woman who suffers shock as a result of an obstetric emergency may have a fast, weak pulse. |  |  |
| 11 | A woman who has an unruptured ectopic pregnancy usually presents with collapse and weakness. |  |  |
| 12 | A pregnant woman who has severe anaemia typically presents with difficulty in breathing. |  |  |
|  | **BLEEDING DURING PREGNANCY AND LABOUR** |  |  |
| 13 | Management of inevitable abortion when the pregnancy is greater than 16 weeks usually involves administration of ergometrine or misoprostol. |  |  |
| 14 | Manual vacuum aspiration (MVA) is an effective method for the treatment of incomplete abortion if the uterine size is not greater than eight weeks. |  |  |
| 15 | Assessment of a woman who presents with vaginal bleeding after 22 weeks of pregnancy should be limited to abdominal examination. |  |  |
|  | **BLEEDING AFTER CHILD BIRTH** |  |  |
| 16 | Postpartum haemorrhage is defined as sudden bleeding after childbirth. |  |  |
| 17 | If bleeding is heavy in the case of abruption placentae and the cervix is fully dilated, delivery should be assisted by vacuum extraction. |  |  |
| 18 | Continuous slow bleeding or sudden bleeding after childbirth requires early and aggressive intervention. |  |  |
| 19 | Absent foetal movement and foetal heart sounds, together with ultra-abdominal and/or vaginal bleeding and severe abdominal pain, suggest a ruptured uterus. |  |  |
|  | **MANAGEMENT OF THE THIRD STAGE OF LABOUR** |  |  |
| 20 | Active management of the third stage of labour should be practised only on women who have a history of postpartum haemorrhage. |  |  |
| 21 | If a retained placenta is undelivered after 30 minutes of oxytocin administration and controlled cord traction, and the uterus is contracted, controlled cord traction and fundal pressure should be attempted |  |  |
| 22 | If the cervix is dilated in the case of delayed (secondary ) postpartum haemorrhage, dilatation and curettage should be performed to evacuate the uterus. |  |  |
| 23 | Immediate postpartum haemorrhage can be due to an atonic uterus, trauma to the genital tract, and retained placenta. |  |  |
| 24 | Tears of the cervix, vaginal or perineum, should be suspected when there is immediate postpartum haemorrhage in the presence of a complete placenta and a contracted uterus. |  |  |
| 25 | If manual removal of the placenta is performed, the care provider should place one hand in the uterus and use the other hand to apply traction on the cord. |  |  |
| 26 | If the uterus is inverted following childbirth, the uterine fundus is not felt on abdominal palpation, there may be slight or intense pain, and the inverted uterus may be apparent at the vulva. |  |  |
| 27 | The appropriate order of steps in active management of the third stage of labor includes controlled cord traction, fundal massage, and oxytocin. |  |  |
|  | **HEADACHES, BLURRED VISION, CONVULSIONS, LOSS OF CONSCIOUSNESS, AND ELEVATED BLOOD PRESSURE** |  |  |
| 28 | Hypertension in pregnancy can be associated with protein in the urine. |  |  |
| 29 | Diastolic blood pressure 90mm Hg or more before 20 weeks of gestation is symptomatic of pregnancy–induced hypertension. |  |  |
| 30 | In a client with hypertension and proteinuria, a severe headache is a symptom of moderate pre-eclampsia. |  |  |
| 31 | An anti-hypertensive drug should be given for hypertension in severe pre-eclampsia or eclampsia if the diastolic blood pressure is 120 mm Hg or more. |  |  |
| 32 | The presenting signs and symptoms of eclampsia include convulsions, diastolic blood pressure of 90mm Hg or more after 20 weeks of gestation, and proteinuria of 2+ or more. |  |  |
| 33 | A pregnant woman who is convulsing should be protected from injury by moving objects away from her. |  |  |
| 34 | The management of mild pre-eclampsia should include sedatives and tranquilizers. |  |  |
| 35 | The drug of choice for preventing and treating convulsions in severe pre-eclampsia and eclampsia is diazepam. |  |  |
|  | **PARTOGRAPH** |  |  |
| 36 | Cervical dilatation plotted to the right of the alert line on the partograph indicates unsatisfactory progress of labour. |  |  |
| 37 | When performing a vaginal examination, cervical dilation of 3 centimetres is recorded on a partograph. |  |  |
| 38 | If a woman is admitted during the active phase of labour, cervical dilation is initially plotted on the partograph to the right of the alert line. |  |  |
| 39 | The care providers must open a partograph for women who are in labour for continuous monitoring once she is 2-3cm dilated. |  |  |
| 40 | A partograph records descent of the foetal head and dilatation from 4cm to 10cm |  |  |
| 41 | Unsatisfactory progress of labour should be suspected if the latent phase is longer than eight hours. |  |  |
|  | **NORMAL LABOUR AND CHILD BIRTH: OBSTETRIC SURGERY** |  |  |
| 42 | Findings diagnostic of cephalopelvic disproportion are secondary arrest of descent of the head in the presence of good contractions. |  |  |
| 43 | If the active phase of labour is prolonged, delivery should be by caesarean section. |  |  |
| 44 | It is recommended to first perform artificial rupture of membranes ( if the membranes are intact ) for the induction of labour, except with clients with HIV. |  |  |
| 45 | Conditions for vacuum extraction are a fetal head at least 0 station or not more than 2/5 above the symphysis pubis and a fully dilated cervix. |  |  |
| 46 | Abdominal palpation to assess descent of the fetal head is equivalent to assessing descent using the station on vaginal examination. |  |  |
| 47 | A head that is felt in the flank on abdominal examination indicates a shoulder presentation or transverse lie. |  |  |
| 48 | When the fetal head is well flexed with occiput anterior or occiput transverse (in early labour), normal childbirth should be anticipated. |  |  |
| 49 | If labour is prolonged in the case of a breech presentation, a caesarean section should be performed. |  |  |
| 50 | In the case of a single large fetus, delivery should be by caesarean section. |  |  |
| 51 | A transverse uterine scar in a previous pregnancy is an indication for elective caesarean section. |  |  |
| 52 | If pre-labour rupture of membranes occurs before 37 weeks of gestation and there are no signs of infection, labour should be induced. |  |  |
| 53 | Meconium staining of amniotic fluid is seen frequently as the foetus matures, and by itself is not an indicator of fetal distress. |  |  |
|  | **NEWBORN RESUSCITATION** |  |  |
| 54 | When using a bag and mask to resuscitate a newborn, the newborn’s neck must be slightly extended to open the airway. |  |  |

**SECTION C: RISK ASSESSMENT SKILL OF RESPONDENTS**

1. **PARTOGRAPH**

**Please refer to the attached partograph for the information needed to answer the following questions. Write your answer to each of the questions provided.**

1. What was the fetal heart rate on admission? -----------------------------------------------------
2. What was the fetal heart rate at 12.30 pm? --------------------------------------------------------
3. When did the membrane rupture? ----------------------------------------------------------------
4. What was the condition of the amniotic fluid at admission? -----------------------------------
5. How much molding of the fetal head was recorded? --------------------------------------------
6. What was the dilation of the cervix on admission? ----------------------------------------------
7. What was the descent on admission? ------------------------------------------------------
8. Describe the contraction at 9 AM?------------------------------------------------------------------------------------------------------------------------------------------------------------------------------
9. List the vital signs on admission---------------------------------------------------------------------------------------------------------------------------------------------------------------------------------
10. How many vaginal examinations were performed during labour?-------------------------------------------------------------------------------------------------------------------------
11. When cervical dilatation passes the alert line, what action should the provider take? Write X next to the best answer.
    1. Evaluate the frequency and duration of contractions
    2. Evaluates cervical dilation
    3. Evaluate fetal descent and condition (fetal heart rate, molding, amniotic fluid)
    4. Evaluating dehydration
    5. Evaluate the woman's psychological status
    6. All of the above
12. Describe the contraction at 11 A.M.. -----------------------------------------------------------------------------------------------------------------------------------------------------------------------------
13. What is your intervention? ---------------------------------------------------------------------------
14. Please indicate on the partograph an area to note the administration of oxytocin. ---------------
15. When the partograph crossed the action line, what should be your action?-------------------------------------------------------------------------------------------------------------------------------
16. Why this action? -----------------------------------------------------------------------------------------
17. **ECLAMPSIA AND HAEMORRHAGE**

**(Please note that you are expected to list a series of interventions/actions that you will perform on such a patient.)**

**Case A.** **Section 1**. A 26-year-old woman who is 7 months pregnant comes in complaining of headaches, blurred vision, and epigastric pain, and her face looks swollen. In this facility, what would you usually do to establish a diagnosis?

i.-----------------------------------------------------------------------------------

ii.-----------------------------------------------------------------------------------

iii.------------------------------------------------------------------------------------

iv.--------------------------------------------------------------------------------------

v. ------------------------------------------------------------------------------------- **(Section maximum: 5 points)**

**Case A. Section 2**. On examination, she had a blood pressure of 170/120mm Hg, 3+ protein in her urine, and brisk reflexes. How would she be managed at this facility?

i.-----------------------------------------------------------------------------------

ii.-----------------------------------------------------------------------------------

iii.------------------------------------------------------------------------------------

iv.--------------------------------------------------------------------------------------

**(Section maximum: 4 points)**

**Case B. Section 1.** A 35-year-old woman who is 8months pregnant comes to this facility because she has started to bleed heavily vaginally. She has no contractions and does not complain of any pain. In this facility, what would you usually do to establish a diagnosis?

i.-----------------------------------------------------------------------------------

ii.-----------------------------------------------------------------------------------

iii.------------------------------------------------------------------------------------

iv.--------------------------------------------------------------------------------------

v. -------------------------------------------------------------------------------------

**(Section maximum: 5 points)**

**Case B. Section 2**. The woman has a feeble pulse at 120 beats/min, her systolic blood pressure is 85mm/Hg, and she is pale, sweating, and breathing rapidly at 30 breaths per minute. Fetal heart sound is normal. There is no pain on abdominal examination. She is still bleeding bright red blood vaginally. You suspect placenta praevia and, therefore, do not perform a vaginal examination. How would such a patient be managed now?

i.-----------------------------------------------------------------------------------

ii.-----------------------------------------------------------------------------------

iii.------------------------------------------------------------------------------------

iv.--------------------------------------------------------------------------------------

v. -------------------------------------------------------------------------------------

vi.-------------------------------------------------------------------------------------

(**Section maximum: 6 points)**

1. **IMMEDIATE NEWBORN CARE**

| **IMMEDIATE NEWBORN CARE** | | **Done** | **Not done** |
| --- | --- | --- | --- |
| **1.** | The first step in thermal protection for the newborn includes drying the baby thoroughly immediately after birth. |  |  |
| **2.** | Immediate care for a normal newborn includes skin-to-skin contact followed by placing the baby in a warming incubator. |  |  |
| **3.** | When a baby is dried and placed in skin-to-skin contact with the mother, it can contribute to hypothermia in the infant. |  |  |
| **4.** | Before performing an exam on a baby who is 2 hours old and has not been bathed, the skilled provider should wash hands with soap and dry with a clean towel, then put on exam gloves. |  |  |
| **5.** | Care of the umbilicus should include cleansing with cooled, boiled water and leaving it uncovered. |  |  |
| **6.** | The best way to determine if a newborn needs resuscitation is to wait until one minute after birth and assign the Apgar score. |  |  |
| **7.** | Breastfeeding should begin after the baby’s first bath. |  |  |
| **8.** | When counseling the mother about breastfeeding, the skilled provider should tell her to breastfeed on demand for as long as the baby wants to feed. |  |  |
| **9.** | When counseling the mother about her newborn, the skilled provider should help the mother formulate a complication readiness plan for her baby and make sure the mother understands danger signs for her baby and where to go if they arise. |  |  |
| **10.** | To maintain the newborn’s axillary temperature between 36.5ºC and 37.5ºC C it is important to cover the baby’s head, place the baby in skin-to-skin contact on the mother’s chest, and cover with a blanket. |  |  |


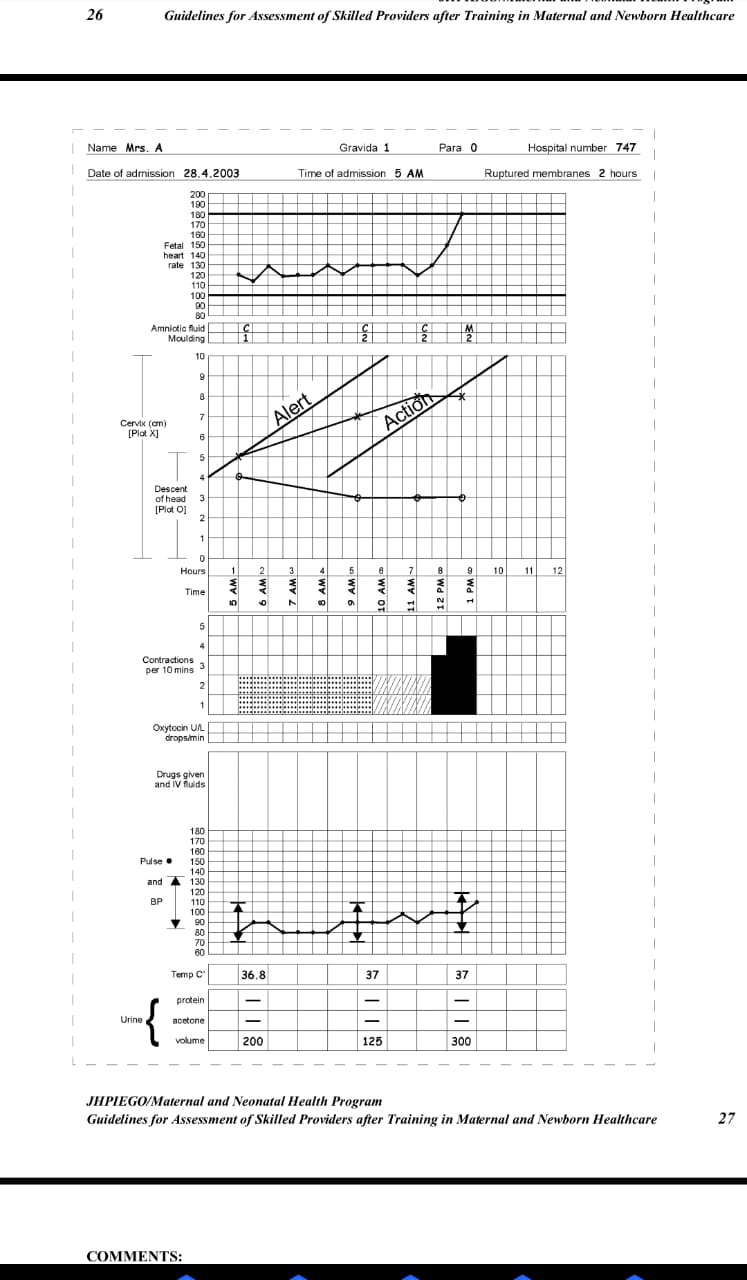

Supplement: Supplementary file 1 [file 786e3de669d04afe9569ec99.docx]
